# Supplementary material for: NGS QC Toolkit: A Toolkit for Quality Control of Next Generation Sequencing Data
Source: PubMed Central journal article supplement (PMC3270013; doi:10.1371/journal.pone.0030619), 2012-02-01
Supplement: pone.0030619.s001.pdf [file pone.0030619.s001.pdf]

**Figure S1** Tables showing statistics generated by IlluQC (A), 454QC (B) and 454QC\_PE (C) tools for QC analysis of Illumina, Roche 454 SE and Roche 454 PE data, respectively. Three tables are generated by the QC tools. First, Parameters; input parameters used for QC. Second, QC statistics; number and percentage of reads filtered at each step of QC analysis. Third, Detailed QC statistics; detailed statistics of both input and HQ filtered data for comparison.

| Parameters                 |                                        | QC statistics                                  |                   |                   |
|----------------------------|----------------------------------------|------------------------------------------------|-------------------|-------------------|
| Library type               | Paired-end                             | File name                                      | s_7_1_sequence.fq | s_7_2_sequence.fq |
| Input files                | s_7_1_sequence.fq<br>s_7_2_sequence.fq | Total number of reads                          | 32950036          | 32950036          |
| Primer/Adaptor library     | Paired End DNA Library                 | Total number of HQ reads                       | 26340664          | 26340664          |
| Cut-off read length for HQ | 70%                                    | Percentage of HQ reads                         | 79.94%            | 79.94%            |
| Cut-off quality score      | 20                                     | Total number of bases                          | 2372402592        | 2372402592        |
| Only statistics            | Off                                    | Total number of bases in HQ reads              | 1896527808        | 1896527808        |
| Number of CPUs             | 20                                     | Total number of HQ bases in HQ reads           | 1843456333        | 1824729397        |
|                            |                                        | Percentage of HQ bases in HQ reads             | 97.20%            | 96.21%            |
|                            |                                        | Number of Primer/Adaptor contaminated HQ reads | 1445931           | 0                 |
|                            |                                        | Total number of HQ filtered reads              | 24894733          | 24894733          |
|                            |                                        | Percentage of HQ filtered reads                | 75.55%            | 75.55%            |

| Detailed QC statistics                    |                   |                   |                            |                            |
|-------------------------------------------|-------------------|-------------------|----------------------------|----------------------------|
| File name                                 | s_7_1_sequence.fq | s_7_2_sequence.fq | s_7_1_sequence.fq_filtered | s_7_2_sequence.fq_filtered |
| Minimum read length                       | 72                | 72                | 72                         | 72                         |
| Maximum read length                       | 72                | 72                | 72                         | 72                         |
| Average read length                       | 72                | 72                | 72                         | 72                         |
| Total number of reads                     | 32950036          | 32950036          | 24894733                   | 24894733                   |
| Total number of reads with non-ATGC bases | 156266            | 7121131           | 36143                      | 5372421                    |
| Percentage of reads with non-ATGC bases   | 0.47%             | 21.61%            | 0.15%                      | 21.58%                     |
| Total number of bases                     | 2372402592        | 2372402592        | 1792420776                 | 1792420776                 |
| Total number of HQ bases                  | 2117658677        | 2064808038        | 1743636443                 | 1727137632                 |
| Percentage of HQ bases                    | 89.26%            | 87.03%            | 97.28%                     | 96.36%                     |
| Total number of non-ATGC bases            | 2149470           | 10842226          | 77827                      | 6059650                    |
| Percentage of non-ATGC bases              | 0.09%             | 0.46%             | 0.00%                      | 0.34%                      |

### (A) IlluQC statistics

| Parameters                              |                                                             |
|-----------------------------------------|-------------------------------------------------------------|
| Input files                             | SRR034685.fastq_illu.fq_fna<br>SRR034685.fastq_illu.fq_qual |
| Primer/Adaptor library                  | Rapid Library (Standard)                                    |
| Homopolymer trimming                    | On                                                          |
| Length of the homopolymer to be removed | 8                                                           |
| Length filter                           | On                                                          |
| Cut-off for minimum read length         | 100                                                         |
| Cut-off read length for HQ              | 70%                                                         |
| Cut-off quality score                   | 20                                                          |
| Only statistics                         | Off                                                         |
| Number of CPUs                          | 20                                                          |

| QC statistics                                                    |                             |
|------------------------------------------------------------------|-----------------------------|
| File name                                                        | SRR034685.fastq_illu.fq_fna |
| Total number of reads                                            | 505332                      |
| Total number of trimmed reads containing homopolymer             | 128795                      |
| Total number of trashed reads (<100 bp in length after trimming) | 84133                       |
| Total number of low quality reads (excluding <100 reads)         | 15734                       |
| Total number of HQ reads                                         | 405467                      |
| Percentage of HQ reads                                           | 80.24%                      |
| Total number of bases                                            | 173871662                   |
| Total number of bases in HQ reads                                | 145562544                   |
| Total number of HQ bases in HQ reads                             | 125010251                   |
| Percentage of HQ bases in HQ reads                               | 85.88%                      |
| Number of Primer/Adaptor trimmed reads                           | 168                         |
| Total number of HQ filtered reads                                | 405465                      |
| Percentage of HQ filtered reads                                  | 80.24%                      |

| Detailed QC statistics          |                             |                                      |
|---------------------------------|-----------------------------|--------------------------------------|
| File name                       | SRR034685.fastq_illu.fq_fna | SRR034685.fastq_illu.fq_fna_filtered |
| Total number of reads           | 505332                      | 405465                               |
| Minimum read length             | 40                          | 100                                  |
| Maximum read length             | 1957                        | 608                                  |
| Average read length             | 344.07                      | 358.99                               |
| Median read length              | 368                         | 375                                  |
| N25 length                      | 472                         | 470                                  |
| N50 length                      | 410                         | 409                                  |
| N75 length                      | 333                         | 332                                  |
| N90 length                      | 244                         | 250                                  |
| N95 length                      | 191                         | 205                                  |
| Total number of bases           | 173871662                   | 145558752                            |
| Total number of HQ bases        | 143958637                   | 125007157                            |
| Percentage of HQ bases          | 82.80%                      | 85.88%                               |
| Average quality score (Overall) | 30.12                       | 31.43                                |

## (B) 454QC statistics

| Parameters                              |                                 |
|-----------------------------------------|---------------------------------|
| Input files                             | SRR001355.fna<br>SRR001355.qual |
| Primer/Adaptor library                  | Rapid Library (Standard)        |
| Homopolymer trimming                    | On                              |
| Length of the homopolymer to be removed | 8                               |
| Length filter                           | On                              |
| Cut-off for minimum read length         | 50                              |
| Cut-off read length for HQ              | 70%                             |
| Cut-off quality score                   | 20                              |
| Only statistics                         | Off                             |
| Number of processes                     | 1                               |

| Detailed QC statistics          |               |                           |
|---------------------------------|---------------|---------------------------|
| File name                       | SRR001355.fna | SRR001355.fna_filt<br>red |
| Total number of reads           | 256503        | 255350                    |
| Minimum read length             | 40            | 25                        |
| Maximum read length             | 348           | 341                       |
| Average read length             | 248.22        | 238.09                    |
| Median read length              | 262           | 255                       |
| N25 length                      | 277           | 274                       |
| N50 length                      | 265           | 260                       |
| N75 length                      | 251           | 240                       |
| N90 length                      | 231           | 198                       |
| N95 length                      | 188           | 172                       |
| Total number of bases           | 63670010      | 60796675                  |
| Total number of HQ bases        | 58364378      | 55872725                  |
| Percentage of HQ bases          | 91.67%        | 91.90%                    |
| Average quality score (Overall) | 27.04         | 27.05                     |

| QC statistics                                                                        |               |                     |
|--------------------------------------------------------------------------------------|---------------|---------------------|
| File name                                                                            | SRR001355.fna |                     |
| Total number of reads                                                                | 256503        |                     |
| QC analysis of Paired reads:                                                         | Paired        | (Read1 / Read2)     |
| Total number of Paired reads                                                         | 81708         | (81708 / 81708)     |
| Total number of trimmed reads containing homopolymer                                 | 3             | (362 / 535)         |
| Total number of trashed reads (<50 bp in length after trimming)                      | 550           | (20819 / 15759)     |
| Total number of low quality reads (excluding <50 reads)                              | 0             | (0 / 190)           |
| Total number of HQ reads                                                             | 45490         | (60889 / 65759)     |
| Percentage of HQ reads                                                               | 55.67%        | (74.52% / 80.48%)   |
| Total number of bases                                                                | 18416651      | (8698504 / 9718147) |
| Total number of bases in HQ reads                                                    | 10413850      | (8144697 / 9253019) |
| Total number of HQ bases in HQ reads                                                 | 9659183       | (7654312 / 8491176) |
| Percentage of HQ bases in HQ reads                                                   | 92.75%        | (93.98% / 91.77%)   |
| Number of Primer/Adaptor trimmed reads                                               | 0             | (13 / 4)            |
| Total number of HQ filtered reads                                                    | 45490         | (60889 / 65759)     |
| Percentage of HQ filtered reads                                                      | 55.67%        | (74.52% / 80.48%)   |
| Total number of HQ filtered reads (Unpaired)                                         | 35668         |                     |
| Percentage of HQ filtered reads (Unpaired)                                           | 43.65%        |                     |
| QC analysis of Unpaired (UPOri) reads:                                               | Total         |                     |
| Total number of Unpaired reads                                                       | 174795        |                     |
| Total number of trimmed reads containing homopolymer                                 | 1762          |                     |
| Total number of trashed reads (<50 bp in length after trimming)                      | 591           |                     |
| Total number of low quality reads (excluding <50 reads)                              | 12            |                     |
| Total number of HQ reads                                                             | 174192        |                     |
| Percentage of HQ reads                                                               | 99.66%        |                     |
| Total number of bases                                                                | 41634226      |                     |
| Total number of bases in HQ reads                                                    | 41387871      |                     |
| Total number of HQ bases in HQ reads                                                 | 38034881      |                     |
| Percentage of HQ bases in HQ reads                                                   | 91.90%        |                     |
| Number of Primer/Adaptor trimmed reads                                               | 26            |                     |
| Total number of HQ filtered reads (Unpaired)                                         | 174192        |                     |
| Percentage of HQ filtered reads (Unpaired)                                           | 99.66%        |                     |
| -----                                                                                |               |                     |
| Number of HQ filtered reads (Paired)                                                 | 45490         | (17.73%)            |
| Number of HQ filtered reads (UPPair*)                                                | 35668         | (13.91%)            |
| Number of HQ filtered reads (UPOri*)                                                 | 174192        | (67.91%)            |
| -----                                                                                |               |                     |
| Total number of HQ filtered reads                                                    | 255350        | (99.55%)            |
| -----                                                                                |               |                     |
| * UPOri: Unpaired reads (i.e. reads without linker sequence) found in the input file |               |                     |
| UPPair: One of the paired reads which passed QC                                      |               |                     |

## (C) 454QC\_PE statistics
